# Supplementary material
Source: publisher figshare collection journal article supplement (https://karger.figshare.com/ndownloader/files/28515924)
Supplement: Supplementary file 1 [file 28515924]

**Supplementary Table 1. Urban and rural distribution of base sample and ALS patients.**

|  | **MarketScan** |  | **IDV** |  | |
| --- | --- | --- | --- | --- | --- |
| **Location** | **Base Sample*** | **ALS Cases** | **Base Sample*** | **ALS Cases** | |
| Total number | 100M | 7,316 | 270M | 35,208 | |
| Urban/Suburban | 66M (65.7%) | 4,573 (62.5%) | 259M (95.8%) | 33,691 (95.7%) | |
| Rural | 10M (10.2%) | 761 (10.4%) | 10M (3.9%) | 1,457 (4.1%) | |
| Data absent | 24M (24.1%) | 1,982 (27.1%) | 1M (0.3%) | 60 (0.2%) | |
| Note.—Data are number of patients with percentages in parentheses. | | | | |
| M = million; ALS = amyotrophic lateral sclerosis; MarketScan = IBM MarketScan Research Database; IDV = Symphony Health Integrated DataVerse | | | | |
| *Base sample refers to all patients in the database with or without ALS | | | | |
